# Supplementary material for: The impact of spring wheat species and sowing density on soil biochemical properties, content of secondary plant metabolites and the presence of Oulema ssp
Source: PeerJ. 2023 Feb 24;11:e14916. doi: 10.7717/peerj.14916 (PMC9969853; doi:10.7717/peerj.14916)
Supplement: Supplemental Information 1 [file peerj-11-14916-s001.xlsx]

## Sheet: ECO
EKO
		DEH	CAT	PER	Ił	pH CaCl2	Poliphenol	Chlorogenic acid	FRAP	Corg	Adults	Larvae
1	112	0.471	0.464	1.108	4.41	5.016	4675	1315.09	9.69503	0.705	9	105
2		0.481	0.451	1.095	4.41	5.016	4612.5	1316.82	9.79653	0.705	8.5	102.5
3		0.476	0.4575	1.1015	4.41	5.016	4275	1314.6	9.73243	0.705	9	101
4		0.476	0.458	1.1015	4.41	5.016	4406.25	1318.06	9.86062	0.705	8.5	102.5
5	113	0.476	0.489	1.211	4.33	5.34	3681.25	1303.22	9.36385	0.562	7.5	112
6		0.488	0.471	1.276	4.33	5.34	3681.25	1302.23	9.27839	0.562	8	107
7		0.482	0.48	1.2435	4.33	5.34	3825	1301.49	9.25702	0.56	8.5	108.5
8		0.482	0.48	1.2435	4.33	5.34	3850	1304.21	9.32646	0.56	6.5	107.5
9	114	0.492	0.516	1.427	4.59	5.52	3556.25	1300.01	8.95789	0.533	8	127
10		0.502	0.521	1.394	4.59	5.52	3550	1300.5	8.83503	0.533	7.5	120
11		0.497	0.5185	1.4105	4.59	5.52	3525	1299.26	8.75491	0.533	8	122.5
12		0.497	0.5185	1.4105	4.59	5.52	3406.25	1298.27	8.81901	0.533	10	122.5
13	109	0.421	0.442	0.952	4.29	5.39	4275	1287.64	9.21429	0.692	9	2.5
14		0.431	0.449	0.978	4.29	5.39	4325	1289.87	9.24634	0.692	13	2.5
15		0.426	0.4455	0.965	4.29	5.39	4250	1290.36	9.35851	0.692	11	2.5
16		0.426	0.456	0.965	4.29	5.39	4443.75	1288.13	9.3692	0.692	14	3.5
17	110	0.468	0.468	1.172	4.33	5.71	3075	1255.73	8.97926	0.731	5	6
18		0.472	0.45	1.192	4.33	5.71	3187.5	1252.77	9.03802	0.731	6.5	7
19		0.47	0.459	1.182	4.33	5.71	3100	1254.25	8.96323	0.731	6	6
20		0.47	0.46	1.182	4.33	5.71	3168.75	1253.51	8.94187	0.731	5	6
21	111	0.485	0.509	1.308	4.33	6.08	3250	1248.31	8.85106	0.585	6	4
22		0.493	0.521	1.258	4.33	6.08	2968.75	1243.62	8.77628	0.585	6.5	4
23		0.489	0.515	1.283	4.33	6.08	3131.25	1249.06	8.80833	0.585	5	5
24		0.489	0.516	1.283	4.33	6.08	3193.75	1245.1	8.73889	0.585	6.5	2.5

## Sheet: INT
INT
		DEH	CAT	PER	Ił	pH CaCl2	Poliphenol	Chlorogenic acid	FRAP	Corg	Adults	Larvae
1	4	0.618	0.801	1.456	5.11	7.22	3687.5	1294.81	9.37454	0.723	5.5	1.5
2		0.631	0.813	1.448	5.11	7.22	4000	1275.77	9.25168	0.723	5	1
3		0.6245	0.807	1.452	5.11	7.22	3612.5	1279.97	9.35317	0.723	5.5	0.5
4		0.615	0.815	1.451	5.11	7.22	3675	1293.33	9.20361	0.723	5	1
5	5	0.644	0.838	1.529	4.91	7.18	3406.25	1271.07	8.78696	0.874	3	2
6		0.658	0.829	1.557	4.91	7.18	3443.75	1268.35	9.06472	0.874	3.5	2.5
7		0.651	0.8335	1.543	4.91	7.18	3387.5	1268.1	9.00062	0.874	5	2.5
8		0.548	0.821	1.555	4.91	7.18	3418.75	1266.62	9.03802	0.874	3	2
9	6	0.678	0.887	1.597	5.7	7.2	3312.5	1241.53	8.56795	0.755	5	1.5
10		0.689	0.871	1.608	5.7	7.2	3175	1227.9	8.45044	0.755	5.5	2.5
11		0.6835	0.879	1.6025	5.7	7.2	3225	1237.93	8.40236	0.755	5.5	2
12		0.692	0.882	1.604	5.7	7.2	3368.75	1220.61	8.32758	0.755	5.5	2.5
13	1	0.613	0.795	1.386	5.26	7.04	3562.5	1270.08	9.05404	0.701	2	1
14		0.628	0.789	1.371	5.26	7.04	3650	1267.7	8.62671	0.701	2	0.5
15		0.6205	0.792	1.3785	5.26	7.04	3531.25	1263.28	9.72708	0.701	2.5	0
16		0.631	0.791	1.384	5.26	7.04	3606.25	1267.45	8.7923	0.701	1.5	0
17	2	0.639	0.807	1.425	5.47	7.14	3175	1248.26	9.03267	0.828	4.5	1.5
18		0.641	0.801	1.438	5.47	7.14	3225	1249.76	8.68547	0.828	6	1
19		0.64	0.804	1.4315	5.47	7.14	3368.75	1248.68	8.67479	0.828	5	0.5
20		0.645	0.809	1.429	5.47	7.14	3112.5	1248.92	8.6641	0.828	5.5	0.5
21	3	0.653	0.825	1.511	5.7	7.12	2781.25	1250.54	7.9255	0.887	3	1
22		0.647	0.834	1.527	5.7	7.12	2818.75	1244.11	7.84504	0.887	4	0.5
23		0.65	0.8295	1.519	5.7	7.12	2762.5	1249.06	7.83357	0.887	4	0
24		0.655	0.838	1.523	5.7	7.12	2793.75	1248.07	7.9882	0.887	4	0
